# Supplementary material for: Assessment of Compliance with National and International Guidelines in the Empirical Management of Community-Acquired Pneumonia (CAP) in Lebanese Hospitals: A Multicenter Retrospective Cohort Study
Source: MDPI journal article supplement (doi:10.3390/antibiotics15060551), 2026-05-30
Supplement: s1 [file antibiotics-4114743-supplementary.pdf › antibiotics-4114743-supplementary.pdf]

**Table S1. Recommended Empirical Antibiotic Therapies for Hospitalized Patients with CAP**

| <b>Clinical Setting</b>               | <b>ATS/IDSA (2019)</b>                                                                                                    | <b>BTS/NICE (2015)</b>                                                     | <b>LSIDCM (2014, Lebanon)</b>                                     |
|---------------------------------------|---------------------------------------------------------------------------------------------------------------------------|----------------------------------------------------------------------------|-------------------------------------------------------------------|
| <b>Inpatient – Non-ICU (moderate)</b> | Beta-lactam (e.g., ceftriaxone) + <b>Macrolide</b><br>(azithromycin or clarithromycin); or<br>Respiratory Fluoroquinolone | Beta-lactam + <b>Macrolide</b>                                             | Beta-lactam (e.g., ceftriaxone) + <b>Azithromycin</b>             |
| <b>Inpatient – Severe/ICU</b>         | Beta-lactam + <b>Azithromycin</b> (preferred);<br>or Beta-lactam + <b>Respiratory Fluoroquinolone</b>                     | Broad-spectrum Beta-lactam + <b>Macrolide</b><br><b>or Fluoroquinolone</b> | Antipseudomonal Beta-lactam + <b>Azithromycin or Levofloxacin</b> |
| <b>Duration of Treatment</b>          | Minimum 5 days; based on clinical stability                                                                               | Typically, 5–7 days                                                        | 5–7 days with de-escalation based on response                     |
